# Supplementary material for: The intrinsically disordered C-terminal region of Arabidopsis thaliana TCP8 transcription factor acts both as a transactivation and self-assembly domain
Source: Royal Society of Chemistry journal article supplement (doi:10.1039/c3mb70128j), 2013-05-09
Supplement: c3mb70128j.pdf [file c3mb70128j.pdf]

A

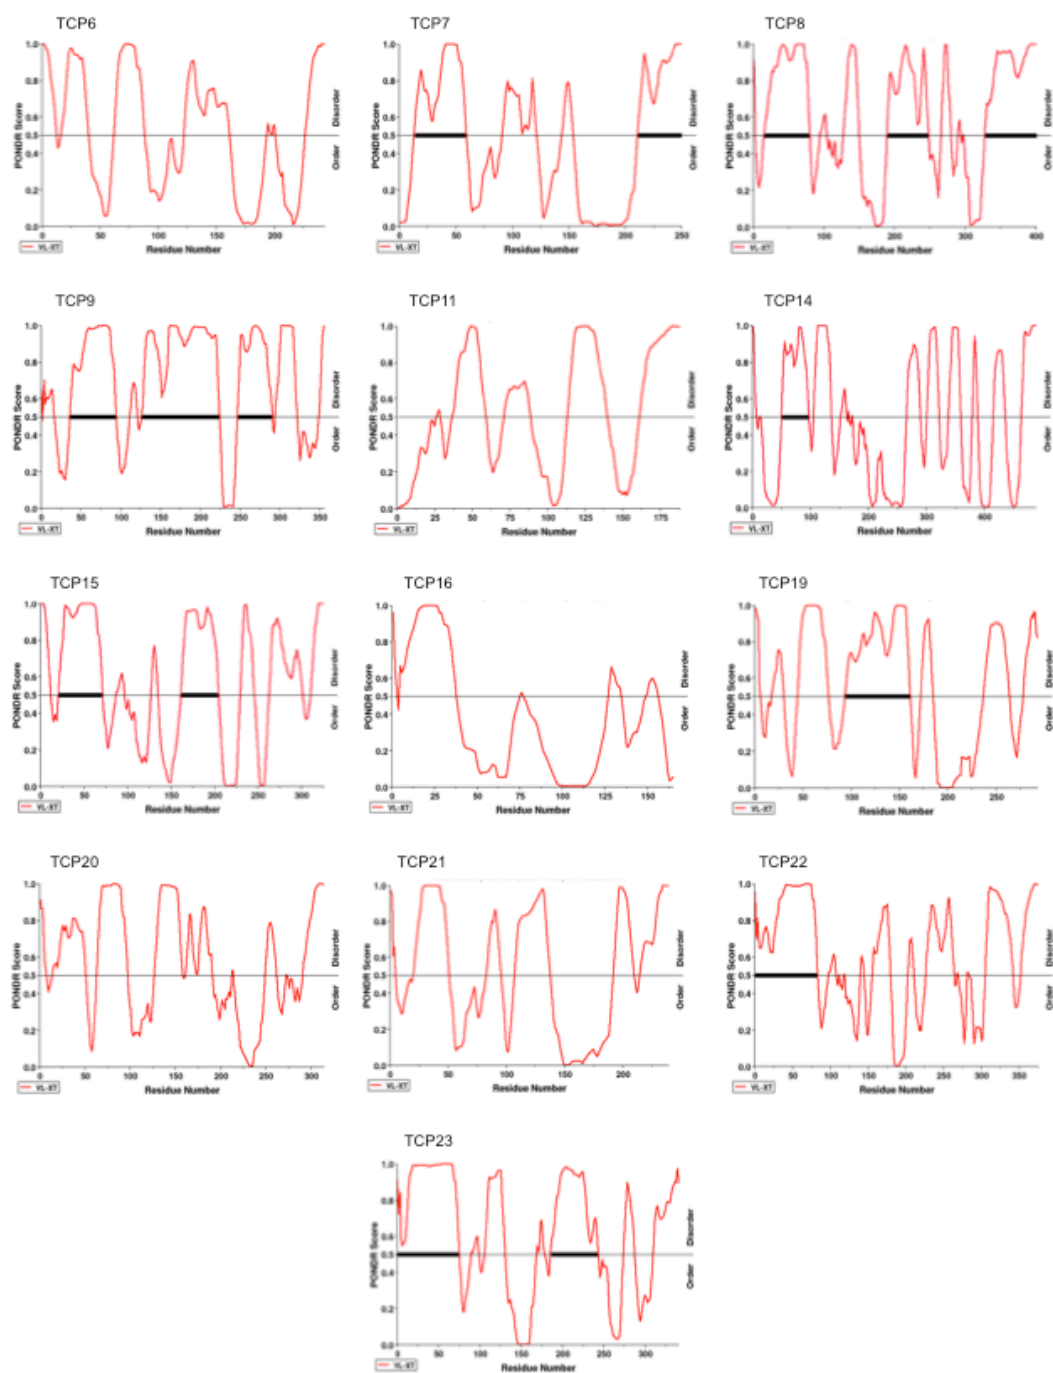

Figure S1

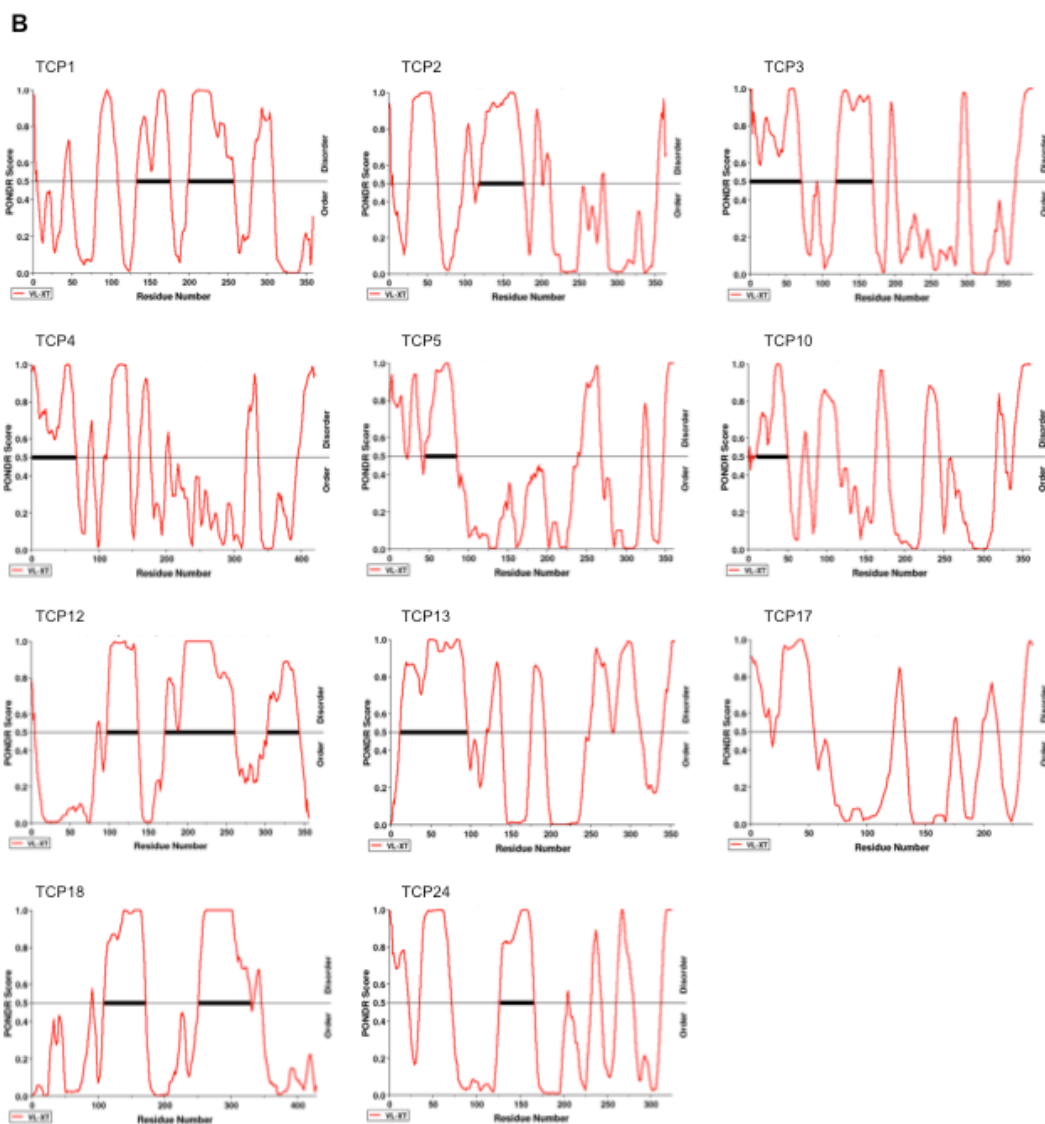

**Figure S1. PONDR prediction of disorder in the TCP family.** Disorder-prediction scores were plotted against each amino acid residue for class I TCPs (A) and class II TCPs (B). The residues that show values above 0.5 are considered as disordered. Thicker line on the threshold line indicates a region of 40 or more consecutive disordered residues.

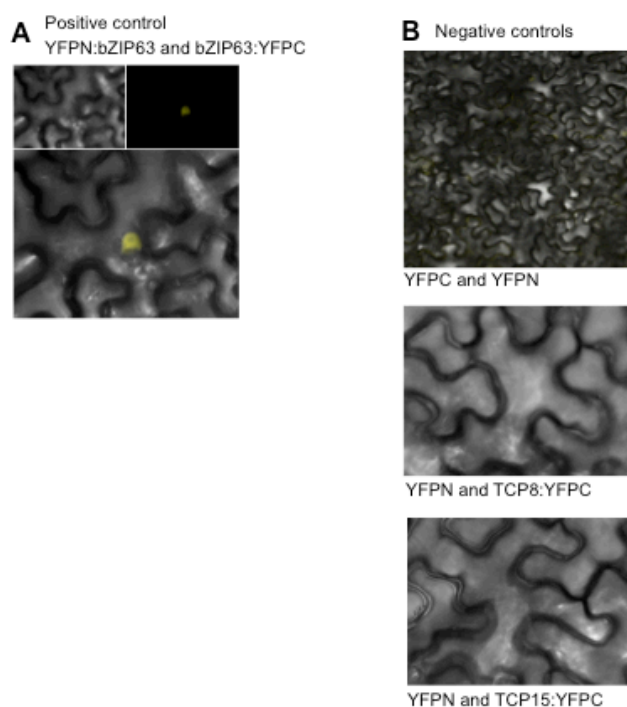

**Figure S2. Control for BiFC experiments.** Positive (A) and negative (B) BiFC controls, merge of bright-field and YFP fluorescence.

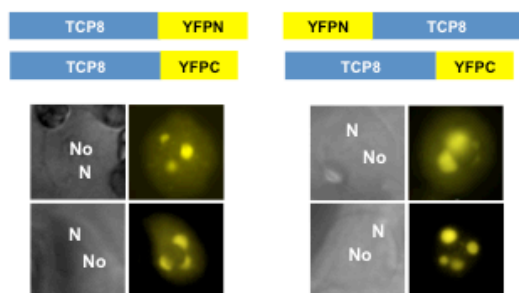

**Figure S3. Additional BiFC views depending on the TCP8 position versus YFP.**

*N. benthamiana* leaves were infiltrated with a mix of *Agrobacterium tumefaciens* transformed with BiFC plasmids carrying the full-length cDNA of *TCP8* in frame with YFPN or YFPC (as indicated in the figure). Brightfield (left panels), YFP fluorescence (right panels); N, nucleus; No, nucleolus. Views are representative of 3 biologically independent experiments.

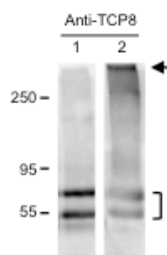

**Figure S4. The C-terminal part of TCP8 is involved in its aggregation capacity.**

Proteins from *N. benthamiana* leaves infiltrated with TCP8 fused with YFPN or YFPC at its C- (lane 1) or N- (lane 2) terminal part, were extracted under denaturing conditions, loaded on SDS-PAGE and blotted. Membranes were probed with anti-TCP8 antibodies. Molecular weight markers (kDa) are indicated on the left.

Primers used for two-hybrid constructions

|                     |                            |
|---------------------|----------------------------|
| F <i>TCP8</i> EcoRI | 5'-TCGAATTCGATCTCTCCGAC-3' |
| R <i>TCP8</i> BamHI | 5'-TAGGATCCTCACTCAGAGCT-3' |

Primers used for BiFC constructions

|                      |                                           |
|----------------------|-------------------------------------------|
| F1 <i>TCP8</i> BamHI | 5'-ATGGATCCATGGATCTCTC-3'                 |
| R1 <i>TCP8</i> XhoI  | 5'-ATCTCGAGCTCAGAGCTAT-3'                 |
| F2 <i>TCP8</i> BamHI | 5'-ATGGATCCGATCTCTCCGA-3'                 |
| R2 <i>TCP8</i> XhoI  | 5'-ATCTCGAGTCACTCAGAGC-3'                 |
| F1 <i>TCP15</i> StuI | 5'-ATAGGCCTATGGATCCGGAT-3'                |
| R1 <i>TCP15</i> XhoI | 5'-TCTCGAGGGAATGATGACTG-3'                |
| F3 <i>TCP8</i>       | 5'-GAACTCGGCTTATTAAGAGGCGGAAACGCAAACGC-3' |
| R3 <i>TCP8</i>       | 5'-GCGTTTGCGTTTCCGCCTCTTAATAAGCCGAGTTC-3' |

**Table S1. Pairs of primers used for the cloning of *TCP8* and *TCP15* in two-hybrid and BiFC plasmids.**

F1 and R1 primers are used to clone *TCP* cDNA in pSPYCE(MR) or pSPYNE(R)173.

F2 and R2 primers are used to clone *TCP* cDNA in pSPYNE173 or pSPYCE(M).

F3 and R3 primers are used to generate the truncated version of *TCP8*.
